# Supplementary material
Source: Springer Nature journal article supplement (https://www.springermedizin.de/resource/supplementary/13550_2013_172_MOESM1_ESM.pdf/9687736)

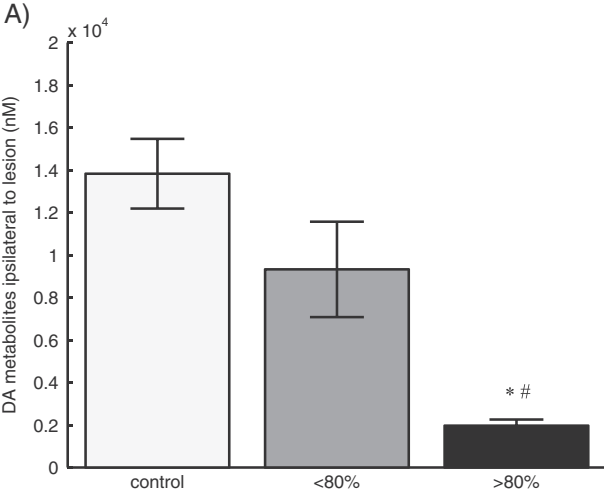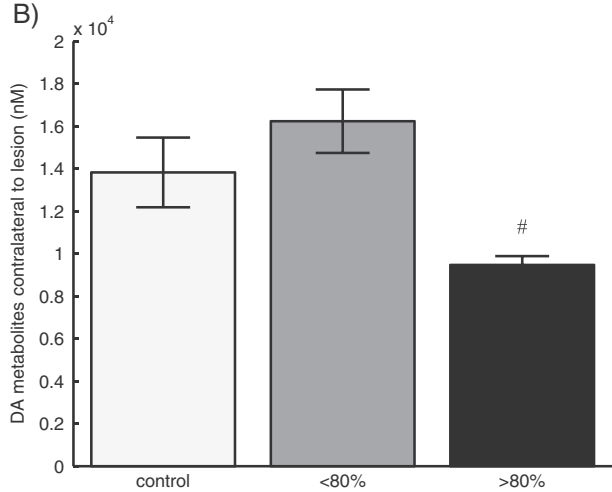

Supplement: MOESM1 [file 9687736]
